# Supplementary material
Source: PubMed Central journal article supplement (PMC4195481)
Supplement: Supp_Fig3.pdf [file Supp_Fig3.pdf]

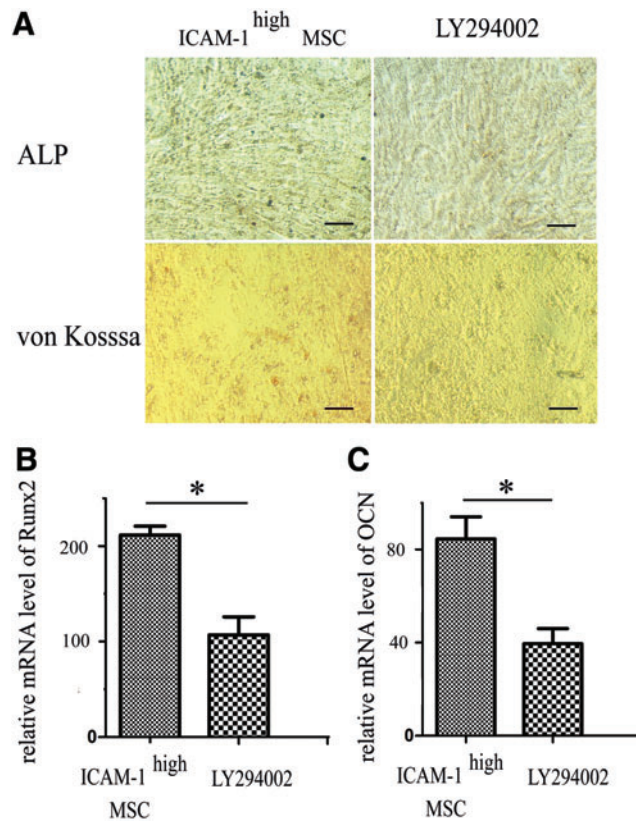

**SUPPLEMENTARY FIG. S3.** Chemical inhibitor LY294002 of the PI3K/AKT pathway strengthened the osteogenic suppression of MSCs. As shown in (A), the inhibitory effect of ICAM-1 on ALP activity and bone matrix mineralization was strengthened after the specific inhibitor LY294002 of the PI3K/AKT was added to the MSC culture. Furthermore, the mRNA expression of Runx2 and OCN in ICAM-1<sup>high</sup> MSCs was downregulated by LY294002 (B, C) ( $p < 0.05$ ). Scale bars represent 100  $\mu$ m (A).
